# Supplementary figures and images for: Identification, Phylogeny, Divergence, Structure, and Expression Analysis of A20/AN1 Zinc Finger Domain Containing Stress-Associated Proteins (SAPs) Genes in Jatropha curcas L
Source: MDPI journal article supplement (doi:10.3390/genes13101766), 2022-09-30

### Ka/Ks annotated evolutionary tree

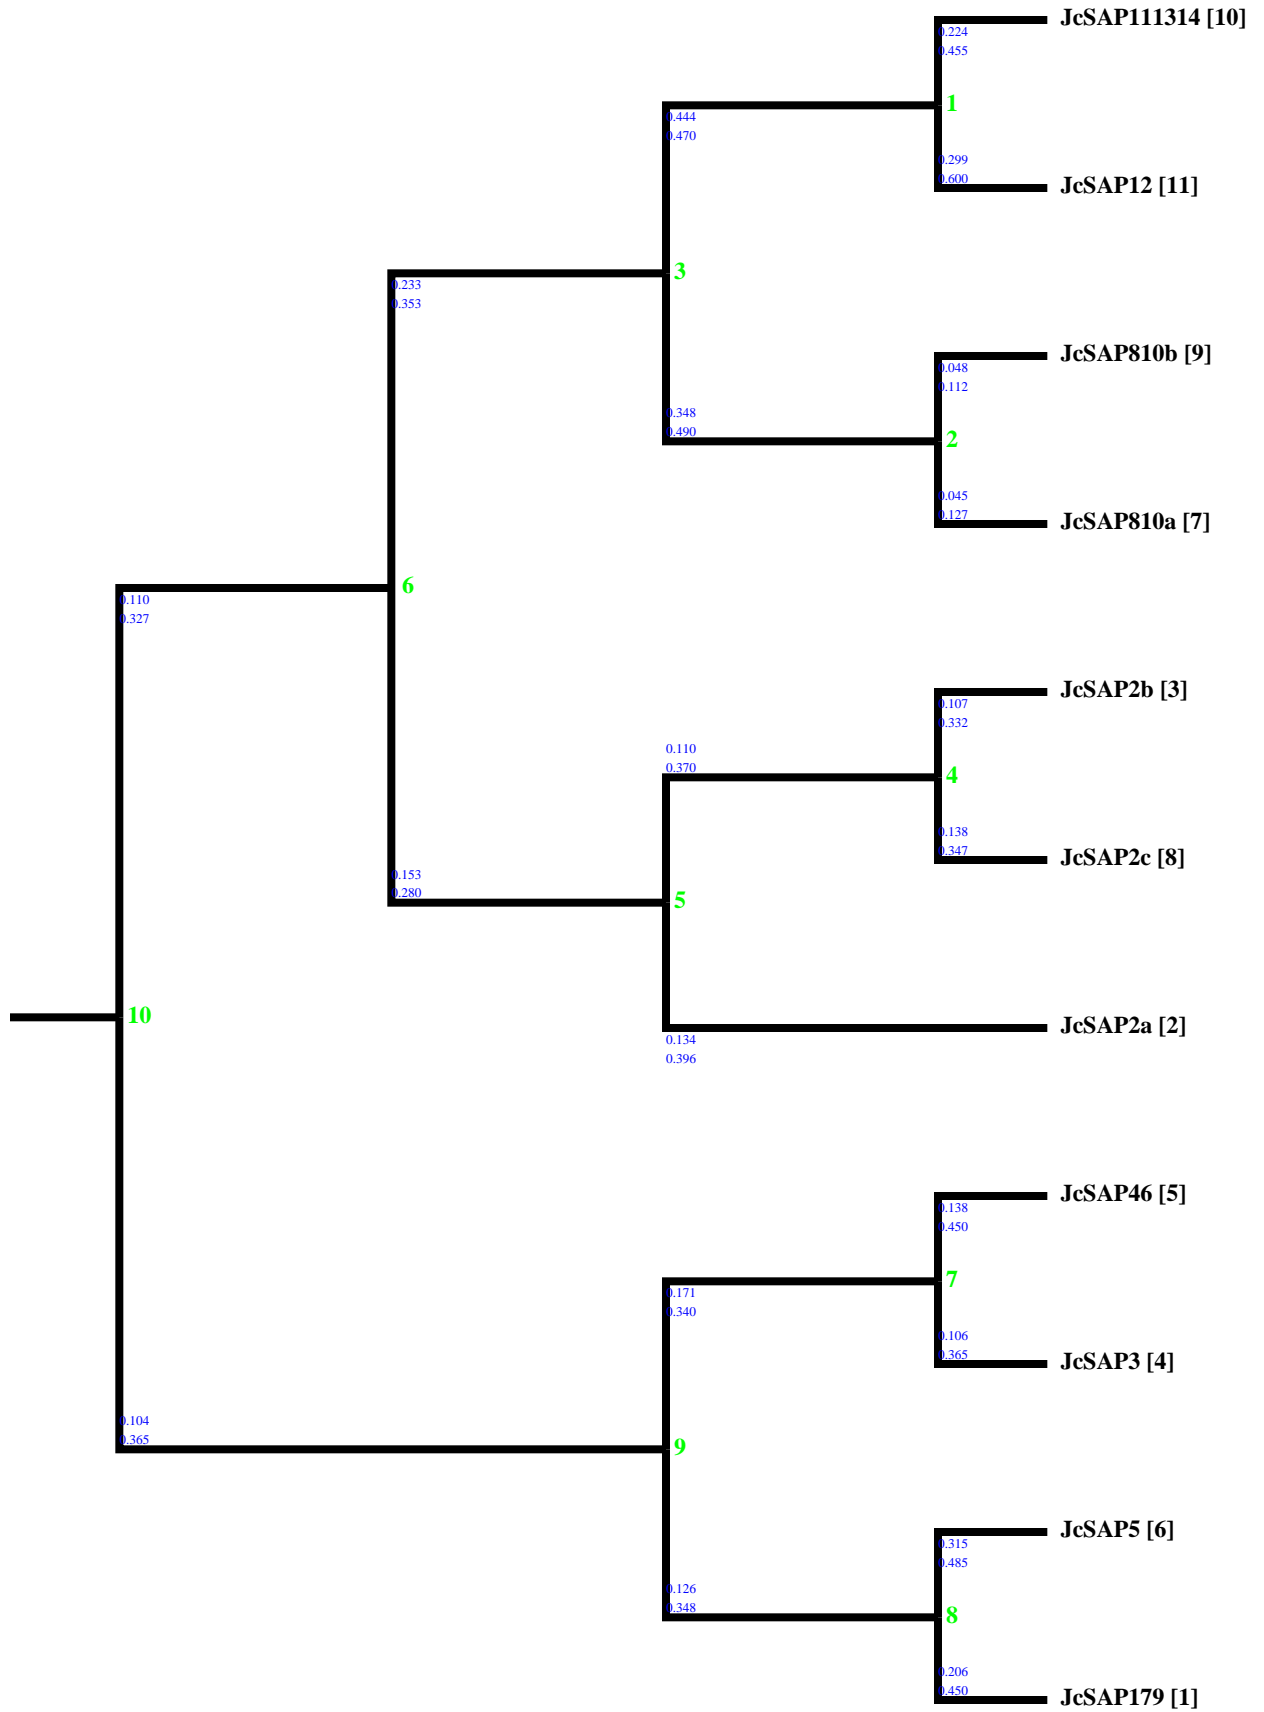

Supplement: s1 [file s1]
